# Supplementary material
Source: PubMed Central journal article supplement (PMC10843262)
Supplement: NIHMS1930612-supplement-1.pdf [file NIHMS1930612-supplement-1.pdf]

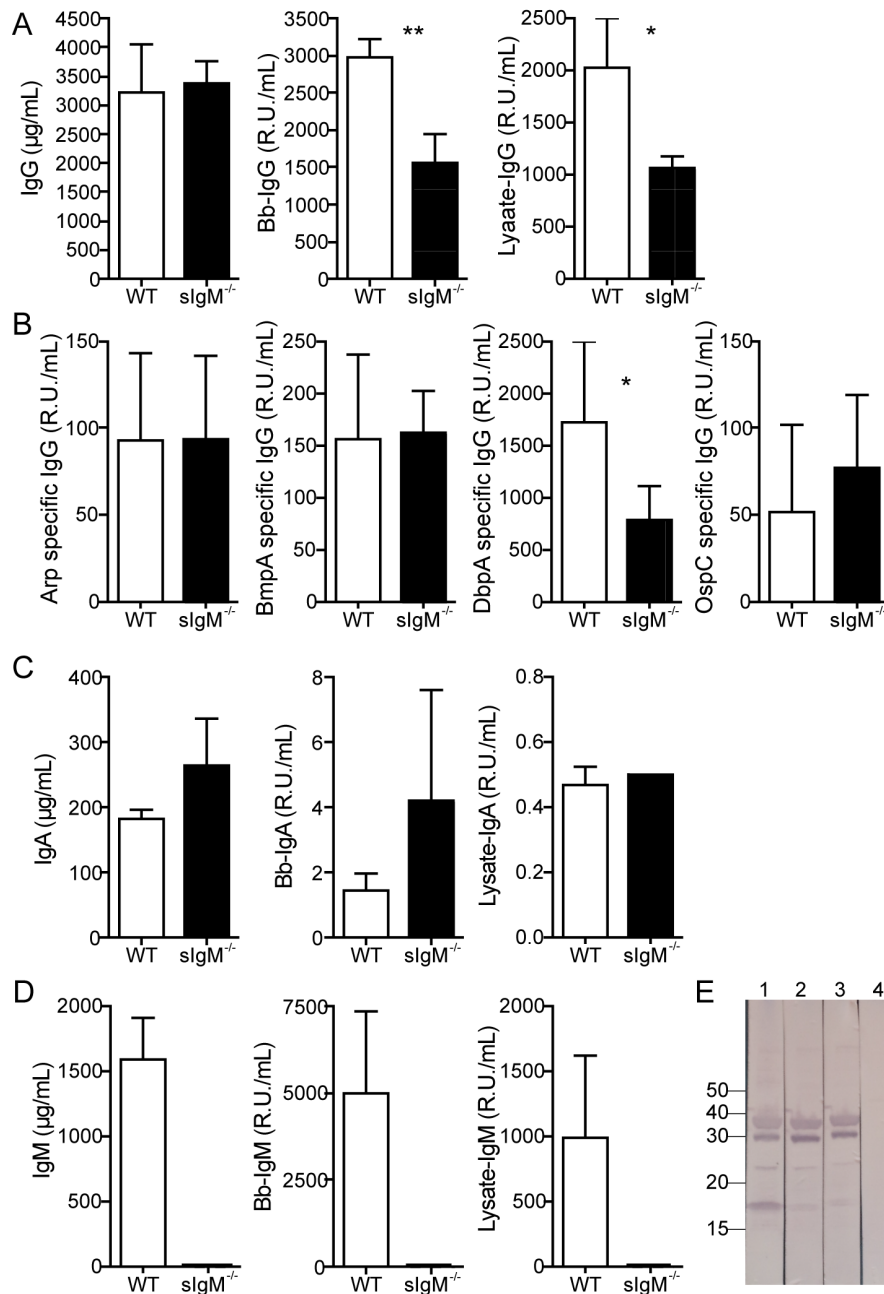

**Suppl. Fig 1. Lack of secreted IgM results in reduced *Borrelia* specific IgG responses.** (A) Shown are total (left), *Borrelia*-recombinant protein cocktail (Arp, BmpA, DbpA, and OspC) (middle), and *Borrelia*-lysate (right) specific serum IgG, (B) individual *Borrelia* recombinant proteins Arp, BmpA, DbpA, and OspC, shown are mean and SD of the group ( $n = 7$ ) (C) IgA and (D) IgM at day 31 of infection. Shown are mean and SD of the group ( $n = 4$ ). Significant statistical values as indicated using unpaired, two-tailed Student's t-test. \*  $p < 0.05$ , \*\*  $p < 0.01$ . (E) Nitrocellulose strips containing *B. burgdorferi* cN40 proteins from whole cell lysate were blotted with immune sera collected at day 31 post infection from wild-type mice (lane 1), slgM<sup>-/-</sup> mice (lanes 2 and 3), and serum from uninfected wild-type mice (lane 4) and probed with alkaline phosphatase-conjugated goat anti-mouse IgG. Numbers indicate molecular weights in thousands.

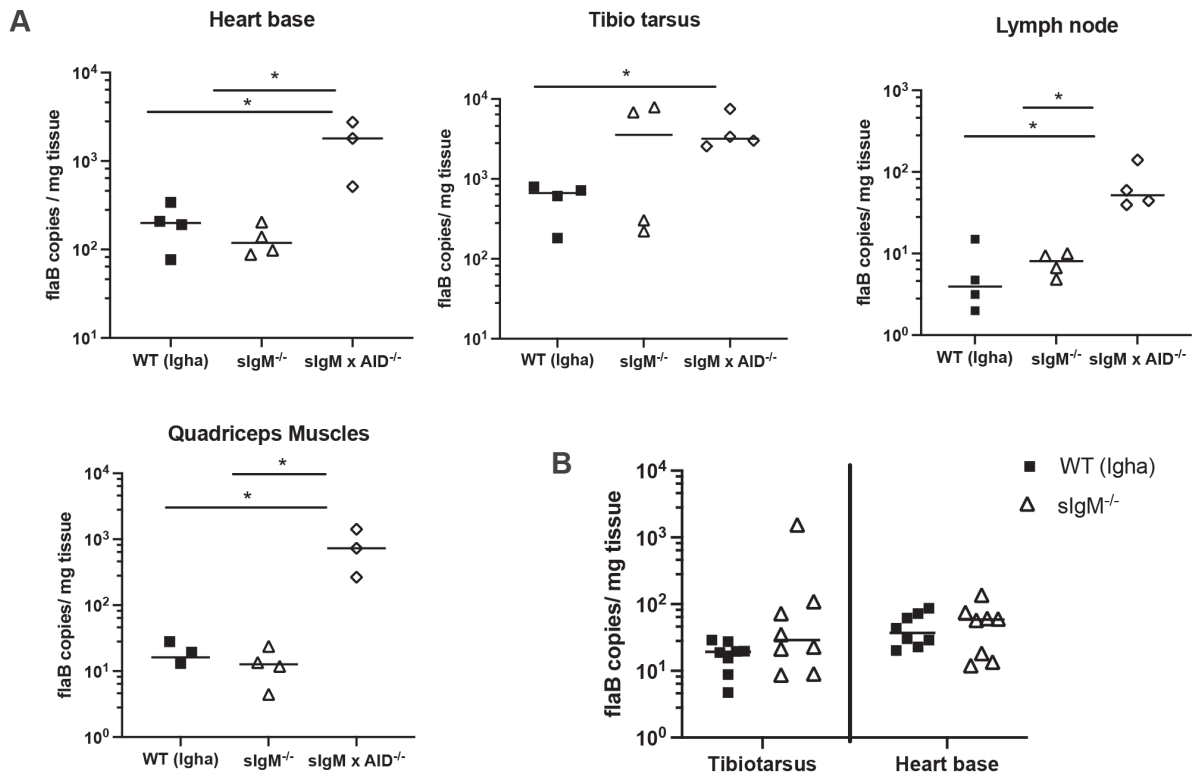

**Suppl. Fig. 2. IgG but not IgM controls *Bb* tissue burden (A)** *Bb* tissue burden on day 30 after *Bb* infection, as assessed by qPCR, measuring *flaB* DNA copy number in indicated tissues of C57BL/6 congenic *Igha*-expressing wild type controls (WT *Igha*,  $n=4$ ), *slgM*<sup>-/-</sup> mice ( $n=4$ ) as well as Ig-deficient double knock out mice lacking *slgM* and the ability to undergo class-switch recombination due to a lack of *aicda* ( $n=3$ ). (B) Shown are *Bb* tissue burden in WT *Igha* ( $n=8$ ) and *slgM*-deficient mice ( $n=8$ ) at day 120 after infection. Each symbol represents results from one mouse, horizontal bar indicates median for the group. \* $p < 0.05$  by multiple unpaired Student's t-test.

**Supplemental Table 1. Arthritis and carditis in day 121 infected WT and sIgM<sup>-/-</sup> mice.**

|                             | <b>Heart<sup>b</sup></b> | <b>R Knee</b>        | <b>R Tibiotarsus</b> |
|-----------------------------|--------------------------|----------------------|----------------------|
| <b>WT-1<sup>a</sup></b>     | (+)                      | -                    | -                    |
| <b>WT-2</b>                 | ND <sup>c</sup>          | -                    | +                    |
| <b>WT-3</b>                 | (trace)                  | -                    | +/- <sup>d</sup>     |
| <b>sIgM<sup>-/-</sup>-1</b> | (+)                      | (trace) <sup>+</sup> | (trace) <sup>+</sup> |
| <b>sIgM<sup>-/-</sup>-2</b> | (+)                      | (trace) <sup>+</sup> | +                    |
| <b>sIgM<sup>-/-</sup>-3</b> | ND                       | -                    | -                    |

<sup>a</sup> Groups of either wild-type (WT, C57BL/6) and sIgM<sup>-/-</sup> mice (n=3) were infected with *Bb* for 121 days. Right legs and heart base were collected for arthritis and carditis assessment as described in Material and Methods.

<sup>b</sup> Carditis in both groups was found to be chronic and inactive

<sup>c</sup> ND, no data

<sup>d</sup> Equivocal (not +)
